# Supplementary material for: Non-Alcoholic Fatty Liver Disease Is Associated with Higher Metabolic Expenditure in Overweight and Obese Subjects: A Case-Control Study
Source: PubMed Central journal article supplement (PMC6723627; doi:10.3390/nu11081830), 2019-08-07
Supplement: nutrients-11-01830-s001.pdf [file nutrients-11-01830-s001.pdf]

**Supplementary Table S1.** Grading used for liver echography.

| <b>Parameter</b>                            | <b>-</b>                                          | <b>+</b>                                             | <b>++</b>                                             |
|---------------------------------------------|---------------------------------------------------|------------------------------------------------------|-------------------------------------------------------|
| <b>Appearance of the liver echotexture</b>  | No difference between kidney and liver parenchyma | Mild discrepancy between liver and kidney parenchyma | Large discrepancy between liver and kidney parenchyma |
| <b>Hepatic echo penetration</b>             | Liver parenchyma visible up to the diaphragm      | Diaphragm not visible or presence of opacities       | Diaphragm not visible and presence of opacities       |
| <b>Clarity of the hepatic blood vessels</b> | Hepatic blood vessels clearly visible             | Loss of echoes of hepatic blood vessels              | Hepatic blood vessels not clearly visible             |
